# Supplementary material for: Synchronous embedded growth of Mo2C nanodisk arrays immobilized on porous carbon nanosheets for ultra-stable sodium storage
Source: Royal Society of Chemistry journal article supplement (doi:10.1039/d3nr03463a), 2023-01-01
Supplement: d3nr03463a1.pdf [file d3nr03463a1.pdf]

## Supporting Information

### **Synchronous embedded growth of Mo<sub>2</sub>C nanodisk arrays immobilized on porous carbon nanosheets for ultra-stable sodium storage**

Minyu Jia,<sup>†</sup> Jingxuan Wei,<sup>†</sup> Yamin Zhang, Linrui Hou, Jinfeng Sun,\* Changzhou Yuan\*

School of Materials Science & Engineering, University of Jinan, Jinan, 250022, P. R.

China

E-mail: [mse\\_sunjf@ujn.edu.cn](mailto:mse_sunjf@ujn.edu.cn) (Dr. J.F. Sun)

[mse\\_yuancz@ujn.edu.cn](mailto:mse_yuancz@ujn.edu.cn); [ayuancz@163.com](mailto:ayuancz@163.com) (Prof. C.Z. Yuan)

<sup>†</sup> The authors equally contributed to the work.

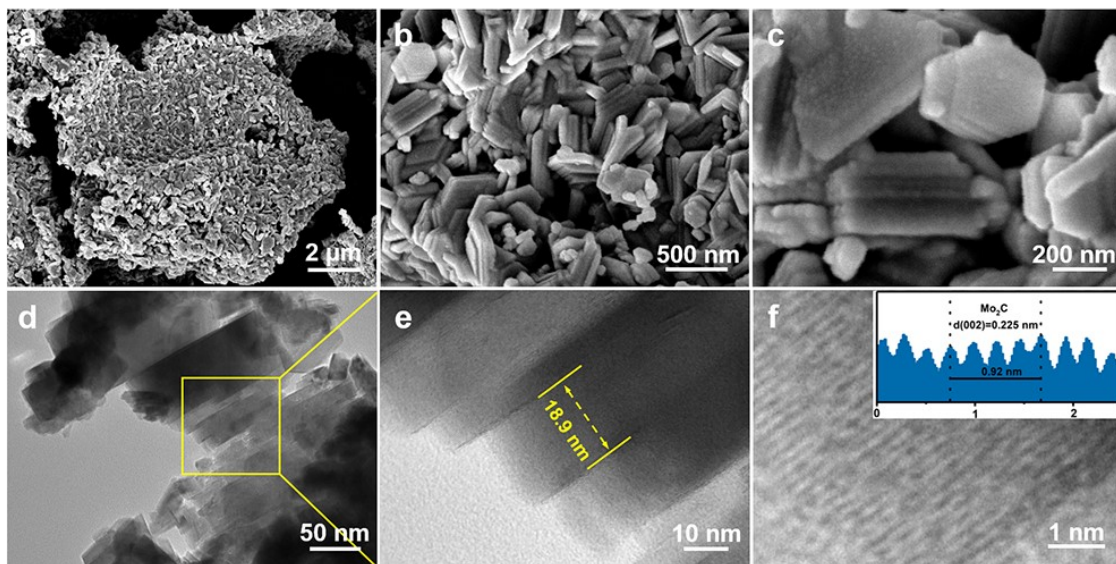

**Fig. S1** (a-c) FESEM images, (d, e) TEM images, and (f) HRTEM image (inset is the corresponding schematic illustration of the interlayer spacing) of Mo<sub>2</sub>C.

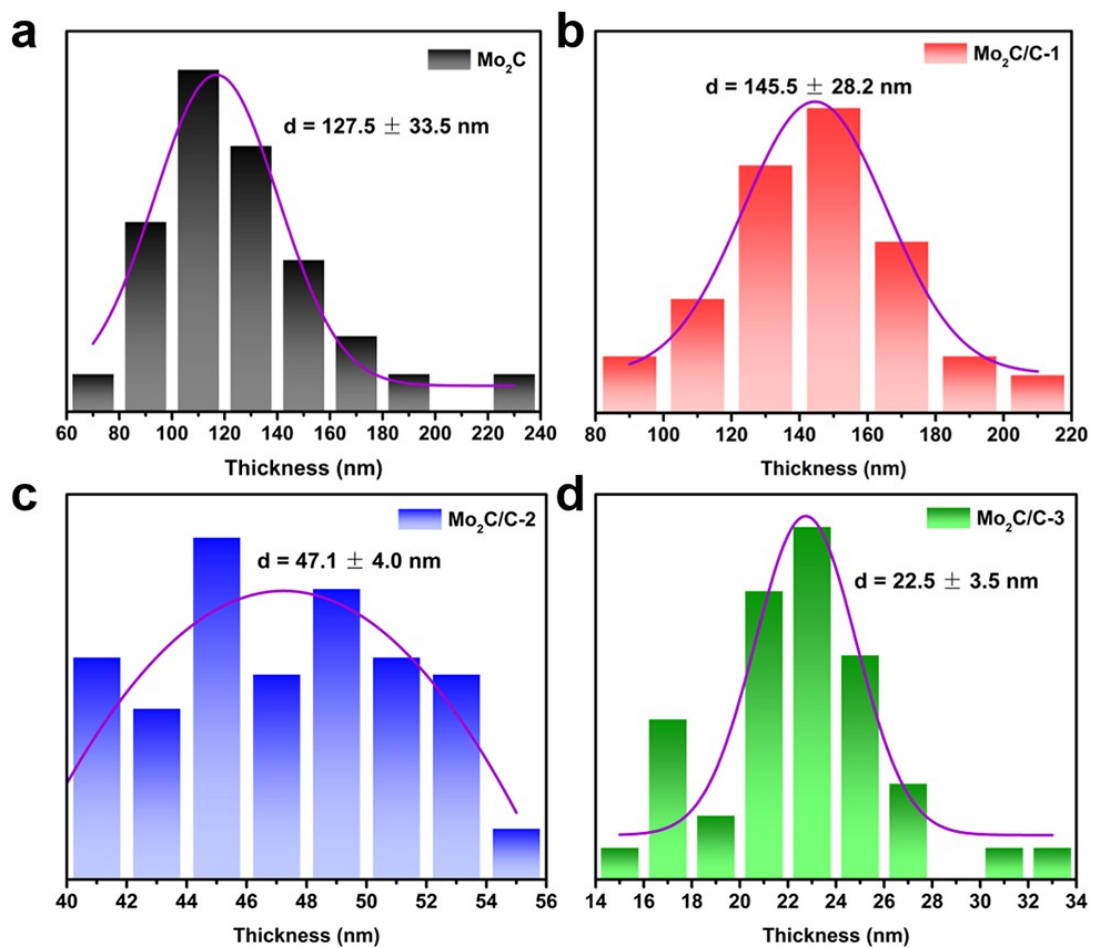

**Fig. S2** Thickness distribution diagrams of  $\text{Mo}_2\text{C}$  NDs in (a)  $\text{Mo}_2\text{C}$ , (b)  $\text{Mo}_2\text{C/C-1}$ , (c)  $\text{Mo}_2\text{C/C-2}$ , and (d)  $\text{Mo}_2\text{C/C-3}$ .

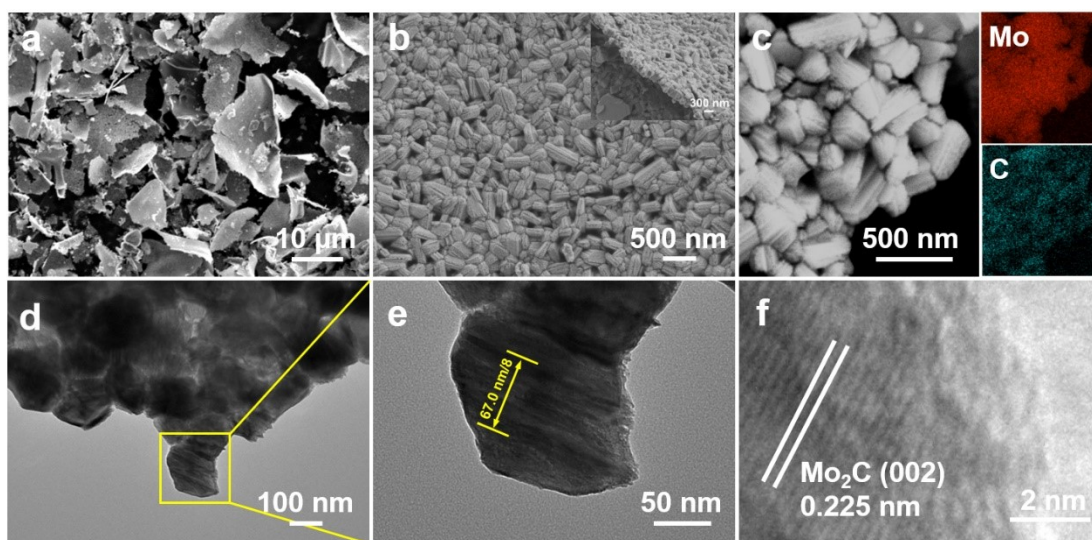

**Fig. S3** (a, b) SEM images, (c) FESEM-EDS, (d, e) TEM images, and (f) HRTEM image of Mo<sub>2</sub>C/C-1.

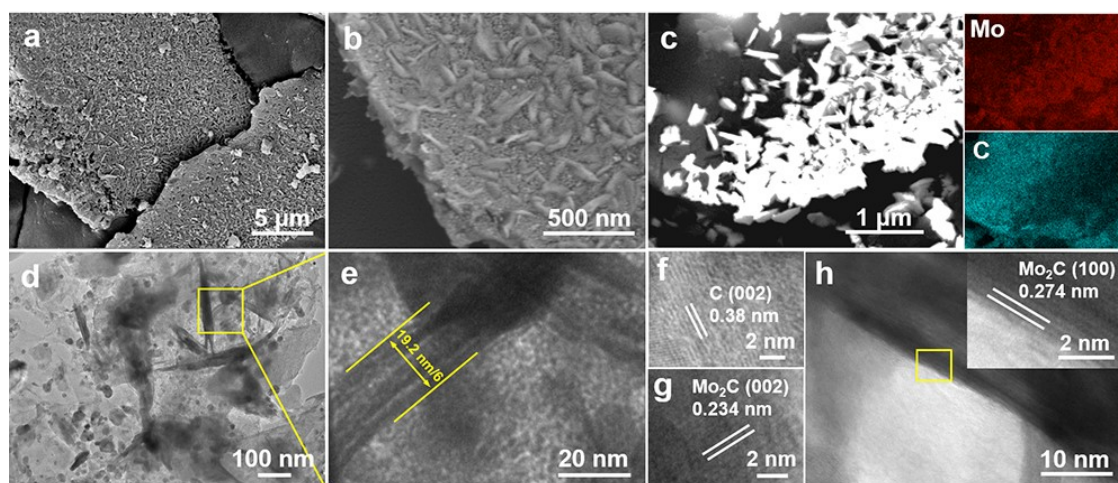

**Fig. S4** (a, b) SEM images, (c) FESEM-EDS, (d, e) TEM images, and (f-h) HRTEM images of Mo<sub>2</sub>C/C-3.

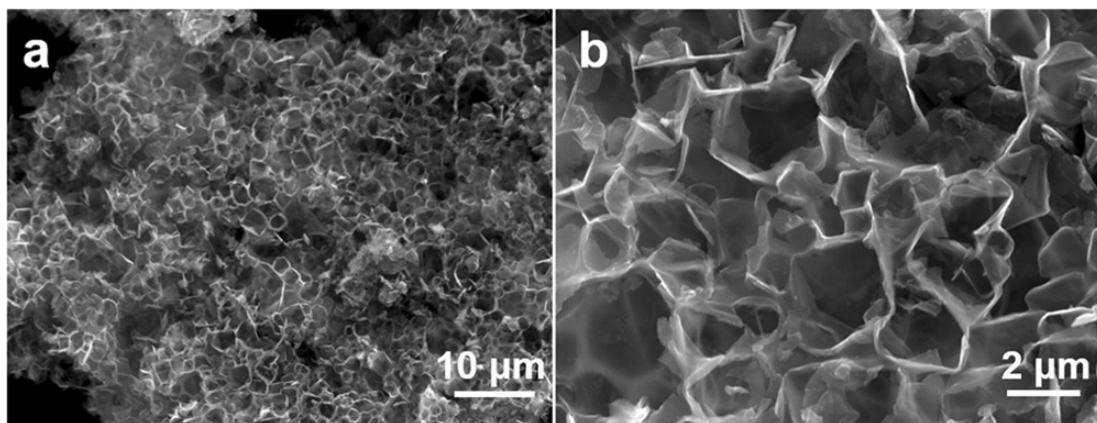

**Fig. S5** (a, b) SEM images of PC.

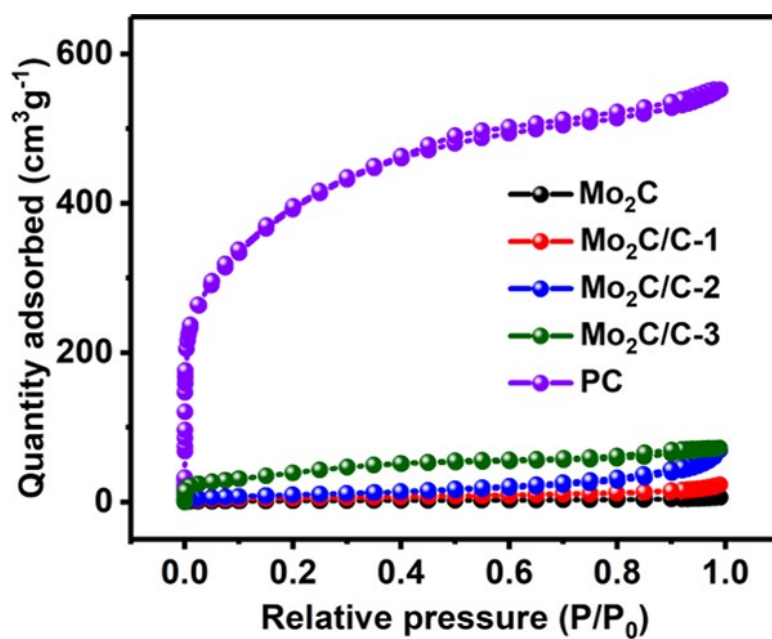

**Fig. S6**  $\text{N}_2$  adsorption/desorption isotherms of  $\text{Mo}_2\text{C}/\text{C}$  composites and PC.

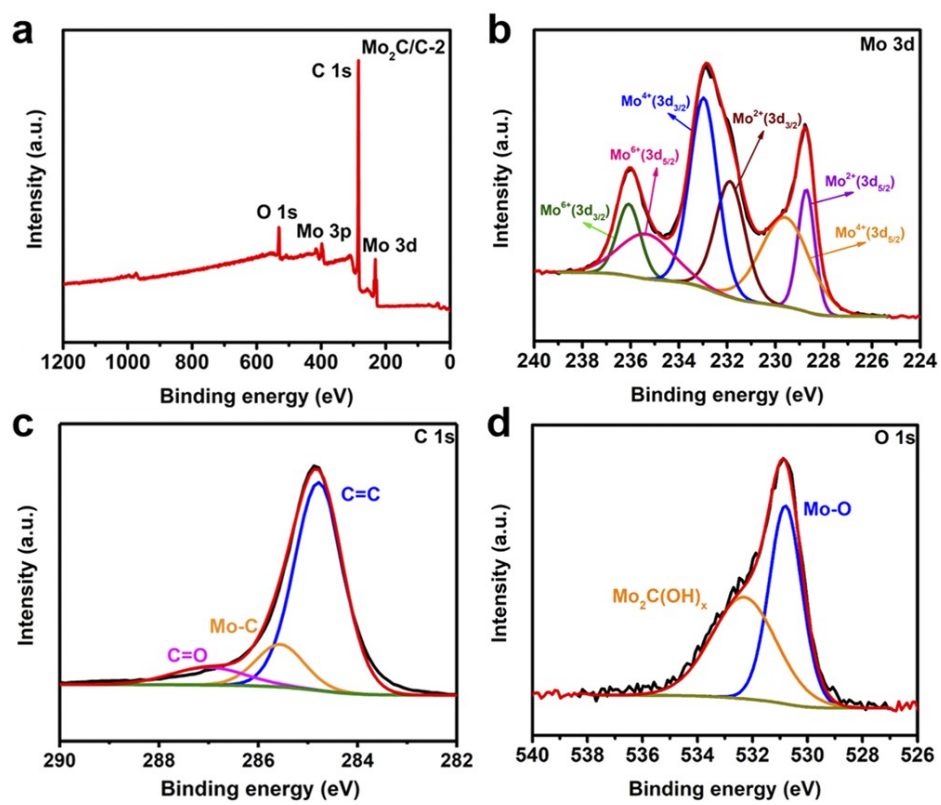

**Fig. S7** (a) XPS survey spectra and high-resolution XPS spectra of (b) Mo 3d, (c) C 1s, and (d) O 1s for Mo<sub>2</sub>C/C-2.



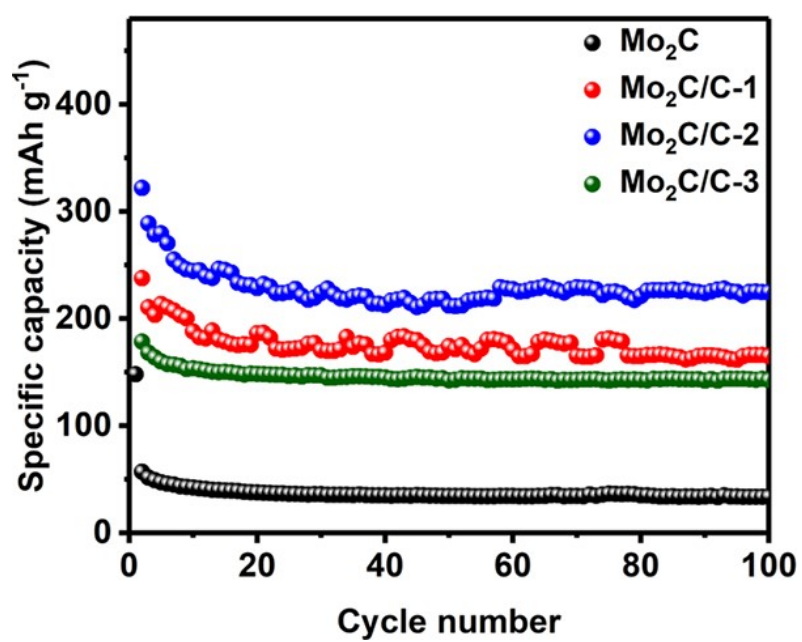

**Fig. S8** Cycling stability at 0.1 A g<sup>-1</sup> of Mo<sub>2</sub>C/C samples.

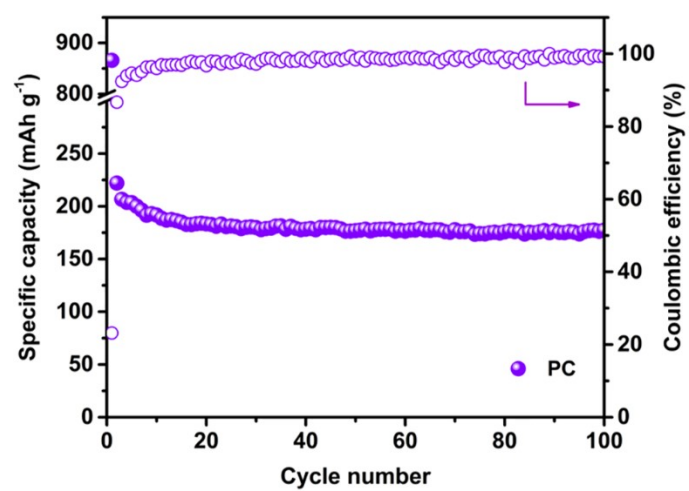

**Fig. S9** Cycling stability at 0.1 A g<sup>-1</sup> of PC as anode material.

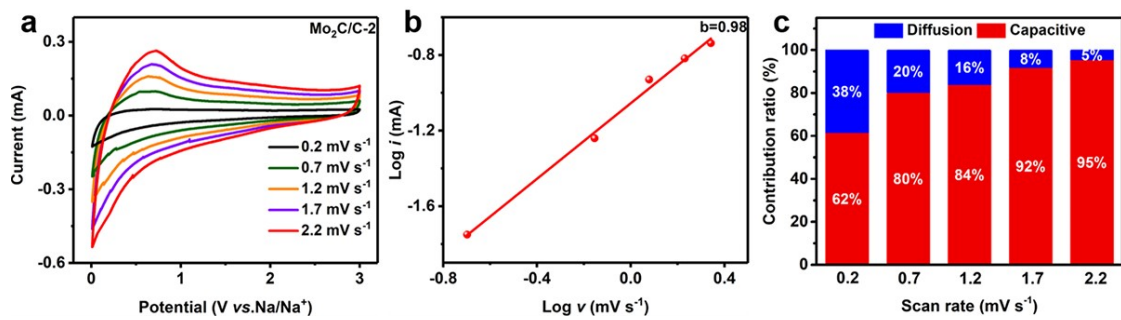

**Fig. S10** (a) CV curves at various scan rates ranging from 0.2 to 2.2 mV s<sup>-1</sup>, (b) Determination of the b-value according to the relationship between the peak current and scan rate, and (c) Normalized contribution ratio of the pseudo capacitive (red) and diffusion-controlled (blue) capacities at different scanning rates for Mo<sub>2</sub>C/C-2.

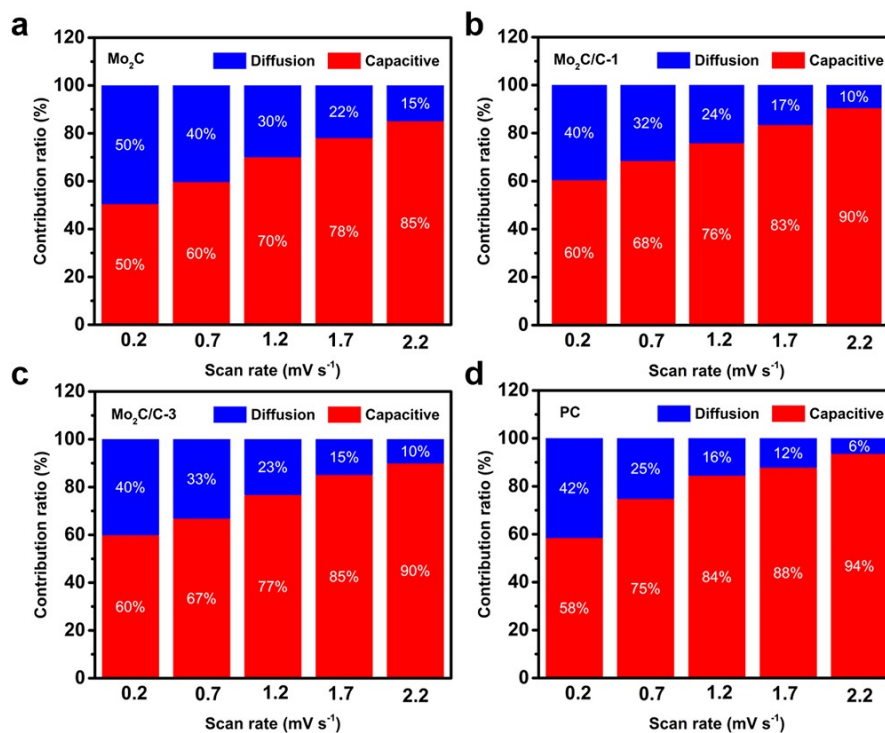

**Fig. S11** Normalized contribution ratio of the pseudo-capacitive (red) and diffusion-controlled (blue) capacities at different scanning rates for (a)  $\text{Mo}_2\text{C}$ , (b)  $\text{Mo}_2\text{C/C-1}$ , (c)  $\text{Mo}_2\text{C/C-3}$ , and (d) PC.

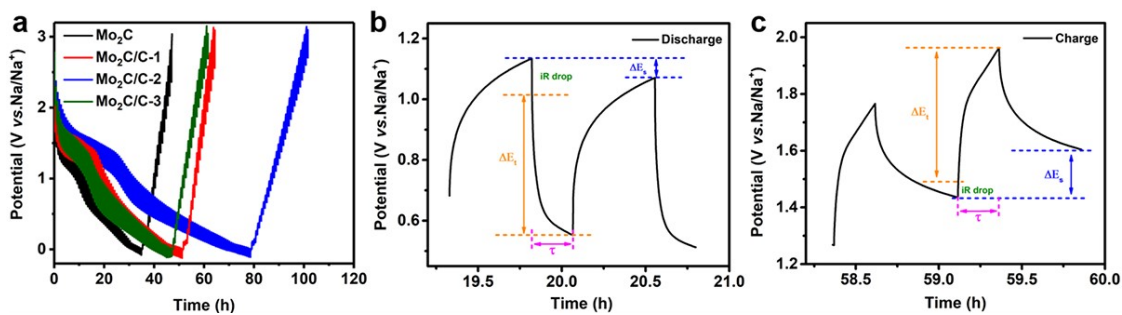

**Fig. S12** (a) GITT plots of Mo<sub>2</sub>C/C electrodes at the first cycle. (b, c) Schematic diagrams of the calculated parameters for Mo<sub>2</sub>C/C-2 electrode during the charge/discharge process as indicated.

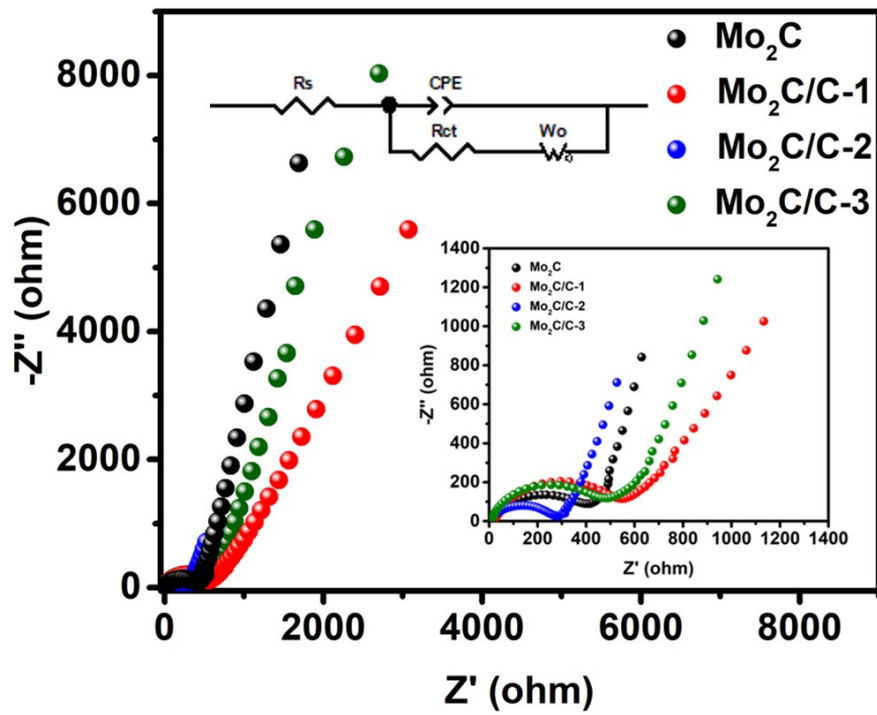

Fig. S13 Nyquist plots of  $\text{Mo}_2\text{C/C}$  anodes as indicated.

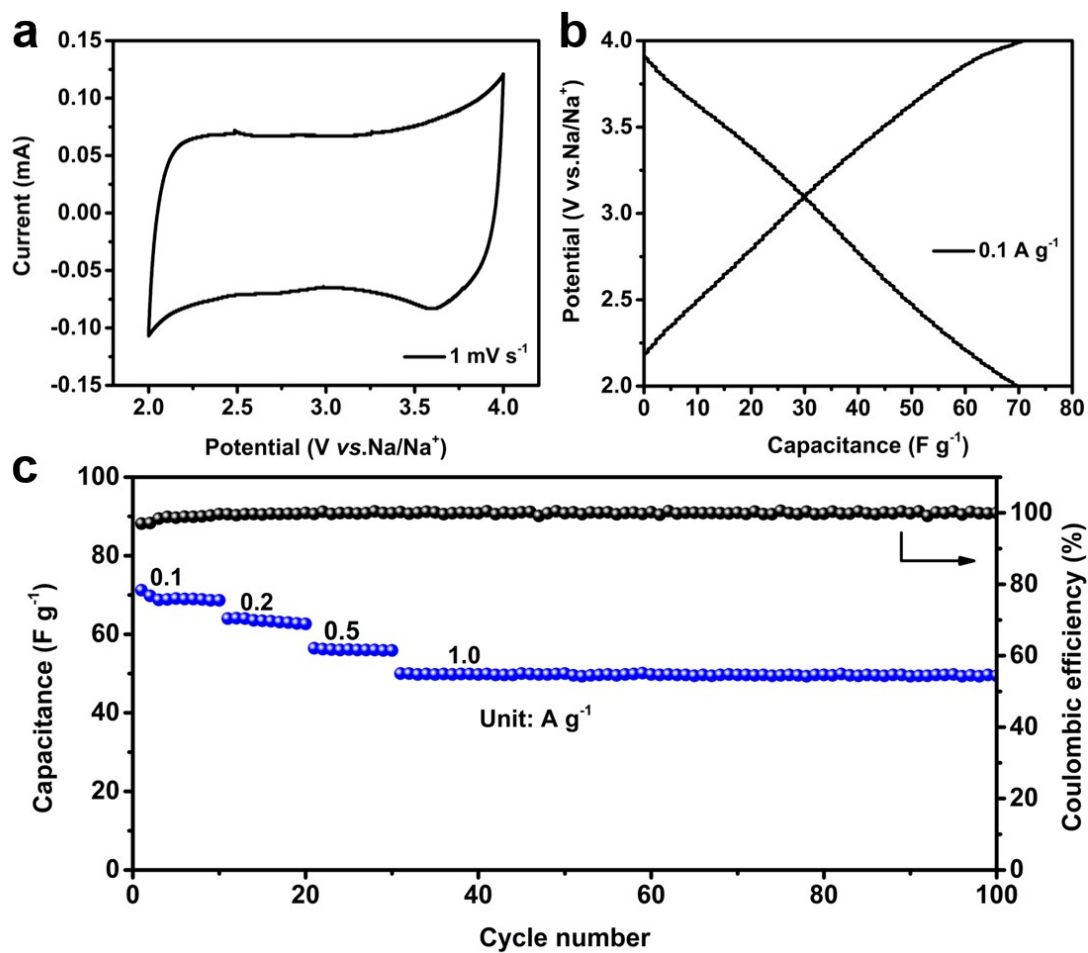

**Fig. S14** Electrochemical performance of PC: (a) CV curve at  $1 \text{ mV s}^{-1}$ , (b) GCD plot at  $0.1 \text{ A g}^{-1}$ , and (c) Rate capacities in the current range from  $0.1$  to  $1 \text{ A g}^{-1}$ .
